# Supplementary material
Source: Springer Nature journal article supplement (https://www.springermedizin.de/resource/supplementary/12879_2008_787_MOESM2_ESM.pdf/9449782)

**Pertussis cases/100,000 inhabitants**

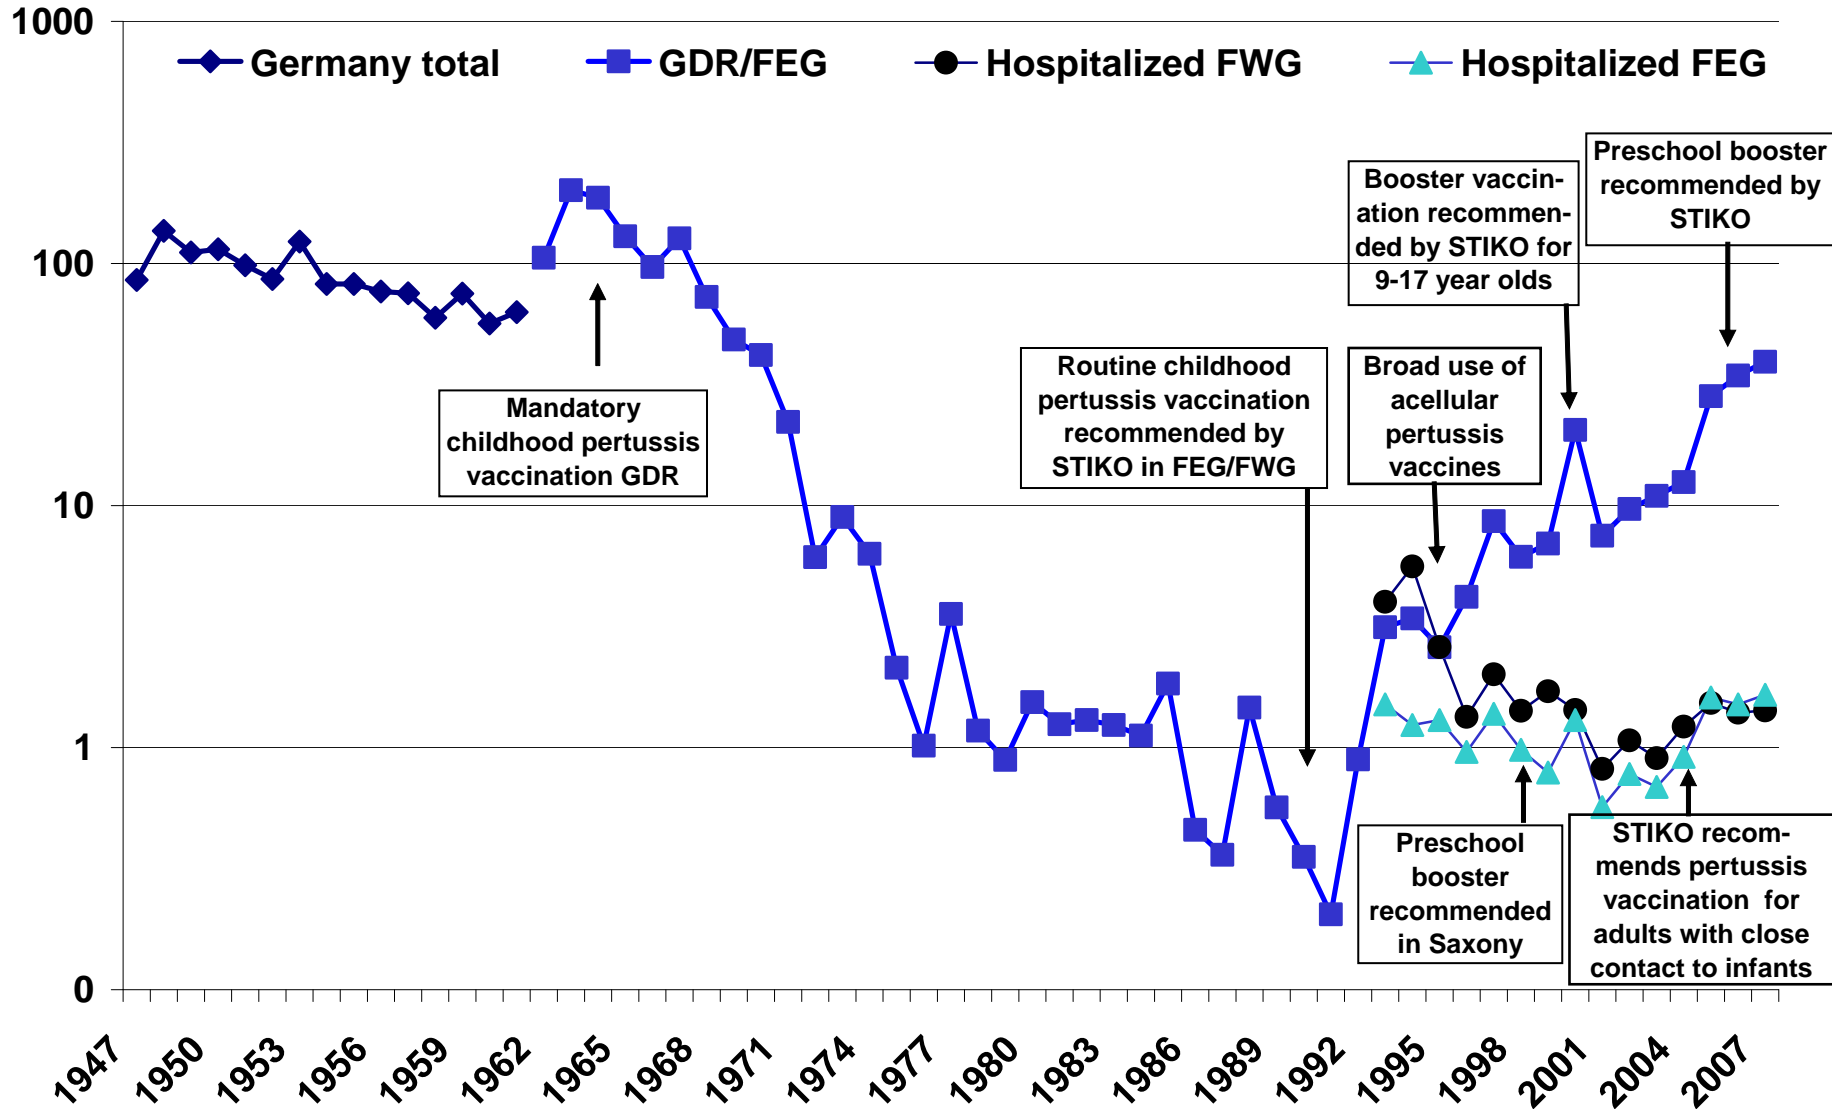

Supplement: MOESM2 [file 9449782]
